# Supplementary material for: Terbium based (poly)ionic liquids for anti-counterfeiting and droplet manipulation
Source: Royal Society of Chemistry journal article supplement (doi:10.1039/d3py01388j), 2024-01-01
Supplement: d3py01388j1.pdf [file d3py01388j1.pdf]

## Supporting Information

for

### **Terbium based (poly)ionic liquids for anti-counterfeiting and droplet manipulation**

Xinhang Cui,<sup>a</sup> Kongying Zhu,<sup>b</sup> Xiaoyan Yuan,<sup>a</sup> Ziming Liu,<sup>a</sup> and Lixia Ren<sup>\*a</sup>

<sup>a</sup> School of Materials Science and Engineering, Tianjin Key Laboratory of Composite and Functional Materials, Tianjin University, Tianjin, 300350, China

<sup>b</sup> Analysis and Measurement Center, Tianjin University, Tianjin, 300072, China

\* Email: lxren@tju.edu.cn

---

## 1. Experimental sections

**Instrumentation.** Carbon-13 nuclear magnetic resonance ( $^{13}\text{C}$  NMR) spectroscopy is performed on a Bruker AVANCE III TM HD 400 MHz at 298 K in DMSO- $d_6$  with tetramethylsilane(TMS) as interior standard. The gel permeation chromatography (GPC) measurements of the samples are performed on a Waters GPC equipped with a 1515 HPLC pump, a 2414 RI detector, and three Agilent mixed columns (Agilent, PLgel 10  $\mu\text{m}$ , MIXED-B, Agilent, PLgel 5  $\mu\text{m}$ , MIXED-C). The eluent is N,N-dimethylformamide (DMF) with 0.01M LiBr, and the flow rate is 1.0 mL/min. **Narrow dispersed polystyrenes are used as standard.** The zero field cooling–field cooling (ZFC-FC) curve is performed under applied magnetic fields of 100 Oe, and the testing temperature range is 5-50 k. The contact angle testing is performed on contact angle measuring instrument-POWEEACH JC 2000D under external magnet. And the concentration of the solution is 1 mol/L. **Differential scanning calorimetry (DSC) is performed on a TA Q2000 at a heating rate of 10  $^{\circ}\text{C}/\text{min}$ . And the testing temperature range is -80-180  $^{\circ}\text{C}$ .**

**Droplet manipulation.** The sample is dissolved in DI water, which the solution concentration is 30 mg/ml. The N-hexane is added to the culture dish, and a drop of sample is added to the culture dish. The process is under the normal light.

---

## 2. Supporting Figures

Figure S1.  $^{13}\text{C}$  NMR spectrum of Vim[I] in DMSO-*d*6.

Figure S2. The gel permeation chromatography trace of PVim.

Figure S3. Temperature *versus* magnetic field intensity curve under zero field cooling and field cooling for (a) Vim[Tb(NO<sub>3</sub>)<sub>4</sub>] and (b) PVim[Tb(NO<sub>3</sub>)<sub>4</sub>].

Figure S4. The contact angle testing under an external magnet for (a)Vim[Tb(NO<sub>3</sub>)<sub>4</sub>] and (b) PVim[Tb(NO<sub>3</sub>)<sub>4</sub>], the solvent is DI water.

Figure S5. The images of (a) Vim[Tb(NO<sub>3</sub>)<sub>4</sub>] and (b) PVim[Tb(NO<sub>3</sub>)<sub>4</sub>] droplet under sunlight.

**Figure S6. DSC curves of the Vim[Tb(NO<sub>3</sub>)<sub>4</sub>] and PVim[Tb(NO<sub>3</sub>)<sub>4</sub>].**

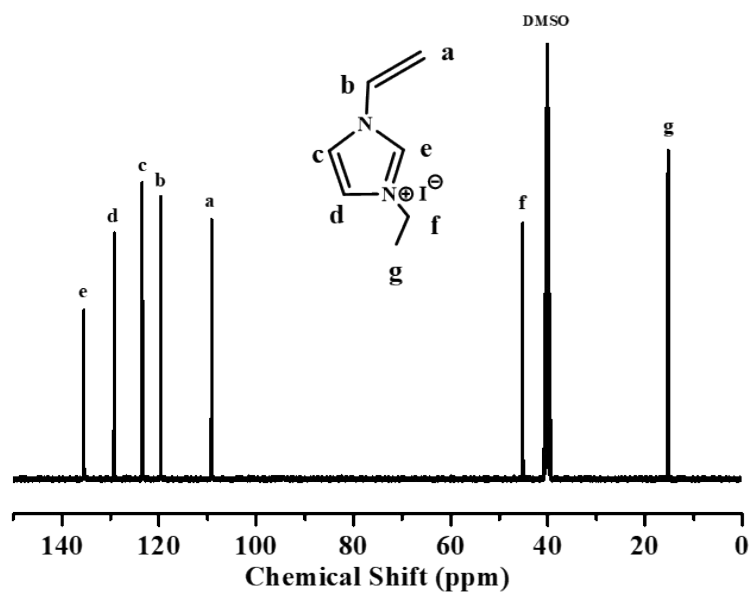

Figure S1.  $^{13}\text{C}$  NMR spectrum of Vim[I] in  $\text{DMSO-}d_6$ .

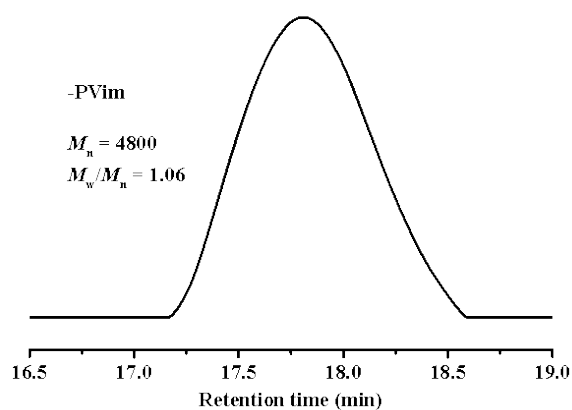

Figure S2. The gel permeation chromatography trace of PVim.

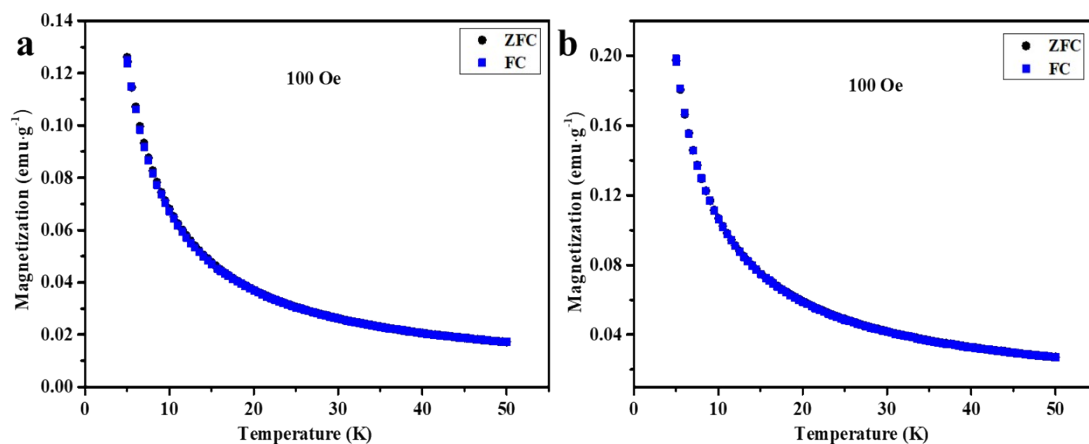

Figure S3. Temperature versus magnetic field intensity curve under zero field cooling and field cooling for (a) Vim[Tb(NO<sub>3</sub>)<sub>4</sub>] and (b) PVim[Tb(NO<sub>3</sub>)<sub>4</sub>].

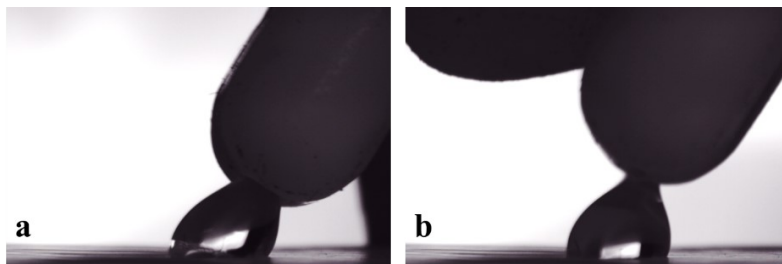

Figure S4. The contact angle testing under an external magnet for (a) Vim[Tb(NO<sub>3</sub>)<sub>4</sub>] and (b) PVim[Tb(NO<sub>3</sub>)<sub>4</sub>], the solvent is DI water.

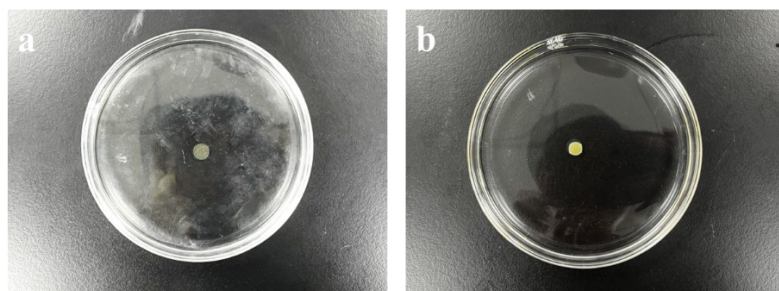

Figure S5. The images of (a) Vim[Tb(NO<sub>3</sub>)<sub>4</sub>] and (b) PVim[Tb(NO<sub>3</sub>)<sub>4</sub>] droplet under sunlight.

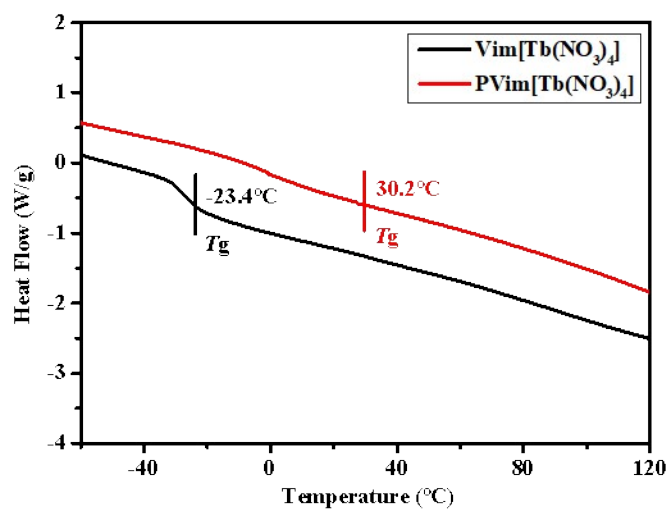

Figure S6. DSC curves of the Vim[Tb(NO<sub>3</sub>)<sub>4</sub>] and PVim[Tb(NO<sub>3</sub>)<sub>4</sub>].
